# Supplementary material for: Optimized Acute Treatment of Migraine Is Associated With Greater Productivity in People With Migraine: Results From the Chronic Migraine Epidemiology and Outcomes (CaMEO) Study
Source: PubMed Central journal article supplement — J Occup Environ Med. 2023 Jan 25;65(4):e261–8. doi: 10.1097/JOM.0000000000002801 (PMC10090340; doi:10.1097/jom.0000000000002801), 2023-01-25
Supplement: joem-65-e261-s002.pdf [file joem-65-e261-s002.pdf]

**Table S1.** mTOQ-5 Responses (N=2455)

| <b>mTOQ-5 Questionnaire<sup>a</sup></b>                                                                                                                                      | <b>Responded “Yes”</b> | <b>Responded “No”</b> |
|------------------------------------------------------------------------------------------------------------------------------------------------------------------------------|------------------------|-----------------------|
| The following questions refer to the times when you take treatment for your headaches. Please choose the answer which most closely fits your experience in the past 4 weeks. |                        |                       |
| 1) Were you able to quickly return to your normal activities (ie, work, family, leisure, social activities) after taking your headache medication?                           | 1403 (57.1)            | 1052 (42.9)           |
| 2) Could you count on your headache medication to relieve your pain within 2 hours for most attacks?                                                                         | 1762 (71.8)            | 693 (28.2)            |
| 3) Did one dose of your headache medication usually relieve your headache and keep it away for at least 24 hours?                                                            | 1357 (55.3)            | 1098 (44.7)           |
| 4) Was your headache medication well tolerated?                                                                                                                              | 2200 (89.6)            | 255 (10.4)            |
| 5) Were you comfortable enough with your headache medication to be able to plan your daily activities?                                                                       | 1922 (78.3)            | 533 (21.7)            |

Data are n (%).

mTOQ-5, 5-item Migraine Treatment Optimization Questionnaire.

<sup>a</sup> Response options = Yes and No. One point is assigned for each response of “Yes” so that total scores range from 0 (worst possible optimization) to 5 (best possible optimization).
