# Supplementary material for: Optimized Acute Treatment of Migraine Is Associated With Greater Productivity in People With Migraine: Results From the Chronic Migraine Epidemiology and Outcomes (CaMEO) Study
Source: PubMed Central journal article supplement — J Occup Environ Med. 2023 Jan 25;65(4):e261–8. doi: 10.1097/JOM.0000000000002801 (PMC10090340; doi:10.1097/jom.0000000000002801), 2023-01-25
Supplement: joem-65-e261-s003.pdf [file joem-65-e261-s003.pdf]

**Table S2.** Negative Binomial Regression Models for Total LPT

|                                                | Rate Ratio (95% CI)  |                      |                      |                      |                      |
|------------------------------------------------|----------------------|----------------------|----------------------|----------------------|----------------------|
|                                                | Model 1              | Model 2              | Model 3              | Model 4              | Model 5              |
| MHDs (reference ≤3 MHDs)                       |                      |                      |                      |                      |                      |
| 4–7                                            | 2.26<br>(2.01, 2.53) | –                    | 2.21<br>(1.98, 2.47) | 2.20<br>(1.97, 2.47) | 2.07<br>(1.82, 2.36) |
| 8–14                                           | 3.65<br>(3.19, 4.16) | –                    | 3.51<br>(3.08, 4.00) | 3.41<br>(2.99, 3.88) | 3.18<br>(2.73, 3.70) |
| ≥15                                            | 5.67<br>(4.91, 6.56) | –                    | 4.94<br>(4.28, 5.71) | 4.95<br>(4.29, 5.72) | 4.75<br>(4.00, 5.63) |
| mTOQ-5 score (reference: 5)                    |                      |                      |                      |                      |                      |
| 4                                              | –                    | 1.64<br>(1.43, 1.88) | 1.29<br>(1.14, 1.46) | 1.26<br>(1.11, 1.43) | 1.25<br>(1.08, 1.45) |
| 3                                              | –                    | 1.97<br>(1.70, 2.28) | 1.63<br>(1.43, 1.86) | 1.62<br>(1.42, 1.85) | 1.61<br>(1.38, 1.87) |
| 2                                              | –                    | 2.21<br>(1.87, 2.61) | 1.69<br>(1.45, 1.96) | 1.69<br>(1.46, 1.97) | 1.57<br>(1.32, 1.88) |
| ≤1                                             | –                    | 2.87<br>(2.41, 3.42) | 2.06<br>(1.76, 2.41) | 2.00<br>(1.71, 2.34) | 1.73<br>(1.44, 2.09) |
| Female (reference: male)                       | –                    | –                    | –                    | 0.89<br>(0.80, 0.99) | 0.81<br>(0.71, 0.92) |
| Annual household income (reference: <\$30,000) |                      |                      |                      |                      |                      |
| \$30,000–\$49,999                              | –                    | –                    | –                    | 1.06<br>(0.89, 1.27) | 1.00<br>(0.81, 1.23) |
| \$50,000–\$74,999                              | –                    | –                    | –                    | 0.99<br>(0.84, 1.18) | 0.97<br>(0.79, 1.18) |
| ≥\$75,000                                      | –                    | –                    | –                    | 0.97<br>(0.82, 1.15) | 0.92<br>(0.76, 1.13) |
| Race (reference: White only)                   |                      |                      |                      |                      |                      |
| Black only                                     | –                    | –                    | –                    | 1.32<br>(1.16, 1.50) | 1.34<br>(1.15, 1.56) |
| Other race                                     | –                    | –                    | –                    | 0.97<br>(0.80, 1.17) | 0.92<br>(0.72, 1.16) |

|                                                                   |   |   |   |                      |                      |
|-------------------------------------------------------------------|---|---|---|----------------------|----------------------|
| ≥2 races                                                          | – | – | – | 1.26<br>(0.99, 1.61) | 1.10<br>(0.82, 1.48) |
| Ethnicity, Hispanic/Latinx<br>(reference: not<br>Hispanic/Latinx) | – | – | – | 1.18<br>(1.04, 1.34) | 1.14<br>(0.99, 1.31) |
| Education (reference: high school or less)                        |   |   |   |                      |                      |
| Some college, technical<br>school, or technical school<br>degree  | – | – | – | 1.02<br>(0.88, 1.19) | 1.05<br>(0.88, 1.25) |
| 4-year college degree                                             | – | – | – | 0.98<br>(0.84, 1.15) | 0.98<br>(0.82, 1.18) |
| Post-college degree                                               | – | – | – | 1.00<br>(0.83, 1.19) | 0.95<br>(0.77, 1.16) |
| Health insurance, yes<br>(reference: no)                          | – | – | – | 1.04<br>(0.85, 1.26) | 0.97<br>(0.78, 1.22) |
| Age (10-year intervals)                                           | – | – | – | 0.88<br>(0.85, 0.92) | 0.90<br>(0.85, 0.94) |
| BMI                                                               | – | – | – | 1.00<br>(1.00, 1.01) | 1.01<br>(1.00, 1.01) |
| Allodynia, yes (ASC ≥3;<br>reference: ASC <3)                     | – | – | – | –                    | 1.37<br>(1.23, 1.53) |
| Migraine symptom severity<br>(MSSS score)                         | – | – | – | –                    | 1.04<br>(1.02, 1.06) |

ASC, Allodynia Symptom Checklist; BMI, body mass index; GAD-7, Generalized Anxiety Disorder 7-item scale; LPT, lost productive time; MHDs, monthly headache days; MIDAS, Migraine Disability Assessment; MSSS, Migraine Symptom Severity Scale; mTOQ-5, 5-item Migraine Treatment Optimization Questionnaire; PHQ-9, 9-item Patient Health Questionnaire.
