# Supplementary material for: Optimized Acute Treatment of Migraine Is Associated With Greater Productivity in People With Migraine: Results From the Chronic Migraine Epidemiology and Outcomes (CaMEO) Study
Source: PubMed Central journal article supplement — J Occup Environ Med. 2023 Jan 25;65(4):e261–8. doi: 10.1097/JOM.0000000000002801 (PMC10090340; doi:10.1097/jom.0000000000002801), 2023-01-25
Supplement: joem-65-e261-s004.pdf [file joem-65-e261-s004.pdf]

**Table S3.** Negative Binomial Regression Models for Absenteeism

|                                               | Rate Ratio (95% CI)  |                      |                      |                      |                      |
|-----------------------------------------------|----------------------|----------------------|----------------------|----------------------|----------------------|
|                                               | Model 1              | Model 2              | Model 3              | Model 4              | Model 5              |
| MHDs (reference ≤3 MHDs)                      |                      |                      |                      |                      |                      |
| 4–7                                           | 2.13<br>(1.84, 2.48) | –                    | 2.07<br>(1.79, 2.40) | 2.00<br>(1.73, 2.31) | 1.91<br>(1.61, 2.27) |
| 8–14                                          | 2.88<br>(2.43, 3.41) | –                    | 2.80<br>(2.37, 3.30) | 2.68<br>(2.27, 3.16) | 2.49<br>(2.04, 3.03) |
| ≥15                                           | 4.16<br>(3.46, 4.99) | –                    | 3.46<br>(2.88, 4.16) | 3.48<br>(2.90, 4.17) | 3.77<br>(3.03, 4.69) |
| mTOQ-5 score (reference: 5)                   |                      |                      |                      |                      |                      |
| 4                                             | –                    | 1.43<br>(1.21, 1.69) | 1.22<br>(1.03, 1.43) | 1.20<br>(1.02, 1.41) | 1.11<br>(0.91, 1.35) |
| 3                                             | –                    | 1.74<br>(1.45, 2.08) | 1.52<br>(1.28, 1.80) | 1.58<br>(1.33, 1.87) | 1.45<br>(1.18, 1.77) |
| 2                                             | –                    | 2.41<br>(1.97, 2.94) | 1.92<br>(1.58, 2.33) | 2.06<br>(1.70, 2.50) | 1.73<br>(1.38, 2.18) |
| ≤1                                            | –                    | 2.94<br>(2.39, 3.62) | 2.31<br>(1.90, 2.82) | 2.30<br>(1.89, 2.81) | 2.07<br>(1.62, 2.64) |
| Female (reference: male)                      | –                    | –                    | –                    | 0.73<br>(0.64, 0.84) | 0.63<br>(0.53, 0.74) |
| Annual household income (reference <\$30,000) |                      |                      |                      |                      |                      |
| \$30,000–\$49,999                             | –                    | –                    | –                    | 1.09<br>(0.87, 1.37) | 1.11<br>(0.85, 1.45) |
| \$50,000–\$74,999                             | –                    | –                    | –                    | 1.13<br>(0.91, 1.40) | 1.18<br>(0.91, 1.53) |
| ≥\$75,000                                     | –                    | –                    | –                    | 1.07<br>(0.87, 1.33) | 1.05<br>(0.81, 1.36) |
| Race (reference: White only)                  |                      |                      |                      |                      |                      |
| Black only                                    | –                    | –                    | –                    | 1.71<br>(1.45, 2.01) | 1.74<br>(1.42, 2.12) |
| Other race                                    | –                    | –                    | –                    | 1.14<br>(0.89, 1.45) | 1.18<br>(0.87, 1.61) |

|                                                                  |   |   |   |                      |                      |
|------------------------------------------------------------------|---|---|---|----------------------|----------------------|
| ≥2 races                                                         | – | – | – | 1.47<br>(1.08, 2.00) | 1.37<br>(0.93, 2.01) |
| Ethnicity, Hispanic/Latinx<br>(reference: not Hispanic/Latinx)   | – | – | – | 1.23<br>(1.05, 1.44) | 1.23<br>(1.02, 1.48) |
| Education (reference: high school or less)                       |   |   |   |                      |                      |
| Some college, technical<br>school, or technical school<br>degree | – | – | – | 0.98<br>(0.81, 1.20) | 0.98<br>(0.78, 1.23) |
| 4-year college degree                                            | – | – | – | 0.84<br>(0.69, 1.03) | 0.85<br>(0.67, 1.08) |
| Post-college degree                                              | – | – | – | 0.77<br>(0.61, 0.96) | 0.70<br>(0.53, 0.92) |
| Health insurance, yes (reference:<br>no)                         | – | – | – | 1.22<br>(0.95, 1.57) | 1.26<br>(0.94, 1.69) |
| Age (10-year intervals)                                          | – | – | – | 0.88<br>(0.83, 0.93) | 0.89<br>(0.84, 0.95) |
| BMI                                                              | – | – | – | 0.99<br>(0.99, 1.00) | 1.00<br>(0.99, 1.01) |
| Allodynia, yes (ASC ≥3; reference:<br>ASC <3)                    | – | – | – | –                    | 1.34<br>(1.16, 1.55) |
| Migraine symptom severity (MSSS<br>score)                        | – | – | – | –                    | 1.03<br>(1.01, 1.06) |

ASC, Allodynia Symptom Checklist; BMI, body mass index; GAD-7, Generalized Anxiety Disorder 7-item scale; MHDs, monthly headache days; MIDAS, Migraine Disability Assessment; MSSS, Migraine Symptom Severity Scale; mTOQ-5, 5-item Migraine Treatment Optimization Questionnaire; PHQ-9, 9-item Patient Health Questionnaire.
