# Supplementary material for: Optimized Acute Treatment of Migraine Is Associated With Greater Productivity in People With Migraine: Results From the Chronic Migraine Epidemiology and Outcomes (CaMEO) Study
Source: PubMed Central journal article supplement — J Occup Environ Med. 2023 Jan 25;65(4):e261–8. doi: 10.1097/JOM.0000000000002801 (PMC10090340; doi:10.1097/jom.0000000000002801), 2023-01-25
Supplement: joem-65-e261-s005.pdf [file joem-65-e261-s005.pdf]

**Table S4.** Negative Binomial Regression Models for Presenteeism

|                                                | Rate Ratio (95% CI)  |                      |                      |                      |                      |
|------------------------------------------------|----------------------|----------------------|----------------------|----------------------|----------------------|
|                                                | Model 1              | Model 2              | Model 3              | Model 4              | Model 5              |
| MHDs (reference $\leq 3$ MHDs)                 |                      |                      |                      |                      |                      |
| 4–7                                            | 2.32<br>(2.04, 2.64) | –                    | 2.26<br>(1.99, 2.57) | 2.27<br>(2.00, 2.58) | 2.10<br>(1.81, 2.44) |
| 8–14                                           | 4.04<br>(3.48, 4.68) | –                    | 3.86<br>(3.34, 4.46) | 3.76<br>(3.25, 4.35) | 3.47<br>(2.92, 4.12) |
| $\geq 15$                                      | 6.44<br>(5.49, 7.56) | –                    | 5.70<br>(4.85, 6.69) | 5.64<br>(4.80, 6.63) | 5.13<br>(4.23, 6.22) |
| mTOQ-5 score (reference: 5)                    |                      |                      |                      |                      |                      |
| 4                                              | –                    | 1.73<br>(1.48, 2.02) | 1.32<br>(1.15, 1.52) | 1.27<br>(1.11, 1.47) | 1.30<br>(1.10, 1.54) |
| 3                                              | –                    | 2.07<br>(1.75, 2.44) | 1.68<br>(1.45, 1.95) | 1.65<br>(1.42, 1.91) | 1.69<br>(1.42, 2.00) |
| 2                                              | –                    | 2.13<br>(1.76, 2.57) | 1.60<br>(1.35, 1.89) | 1.57<br>(1.33, 1.86) | 1.53<br>(1.25, 1.88) |
| $\leq 1$                                       | –                    | 2.84<br>(2.33, 3.45) | 1.95<br>(1.63, 2.32) | 1.88<br>(1.57, 2.25) | 1.63<br>(1.32, 2.02) |
| Female (reference: male)                       | –                    | –                    | –                    | 0.95<br>(0.84, 1.08) | 0.89<br>(0.76, 1.03) |
| Annual household income (reference: <\$30,000) |                      |                      |                      |                      |                      |
| \$30,000–\$49,999                              | –                    | –                    | –                    | 1.04<br>(0.85, 1.27) | 0.96<br>(0.76, 1.21) |

|                                                                  |   |   |   |                      |                      |
|------------------------------------------------------------------|---|---|---|----------------------|----------------------|
| \$50,000–\$74,999                                                | – | – | – | 0.94<br>(0.77, 1.15) | 0.90<br>(0.72, 1.14) |
| ≥\$75,000                                                        | – | – | – | 0.92<br>(0.75, 1.11) | 0.88<br>(0.70, 1.10) |
| Race (reference: White only)                                     |   |   |   |                      |                      |
| Black only                                                       | – | – | – | 1.18<br>(1.02, 1.36) | 1.21<br>(1.01, 1.43) |
| Other race                                                       | – | – | – | 0.89<br>(0.72, 1.11) | 0.81<br>(0.61, 1.07) |
| ≥2 races                                                         | – | – | – | 1.22<br>(0.93, 1.61) | 1.05<br>(0.75, 1.47) |
| Ethnicity, Hispanic/Latinx<br>(reference: not Hispanic/Latinx)   |   |   |   |                      |                      |
|                                                                  | – | – | – | 1.16<br>(1.01, 1.33) | 1.10<br>(0.94, 1.30) |
| Education (reference: high school or less)                       |   |   |   |                      |                      |
| Some college, technical<br>school, or technical school<br>degree | – | – | – | 1.04<br>(0.87, 1.23) | 1.07<br>(0.87, 1.31) |
| 4-year college degree                                            | – | – | – | 1.04<br>(0.87, 1.25) | 1.03<br>(0.84, 1.26) |
| Post-college degree                                              | – | – | – | 1.10<br>(0.90, 1.35) | 1.05<br>(0.83, 1.33) |
| Health insurance, yes (reference:<br>no)                         |   |   |   |                      |                      |
|                                                                  | – | – | – | 0.98<br>(0.78, 1.22) | 0.90<br>(0.70, 1.15) |
| Age (10-year intervals)                                          | – | – | – | 0.89                 | 0.90                 |

|                                               |   |   |   |              |                      |
|-----------------------------------------------|---|---|---|--------------|----------------------|
|                                               |   |   |   | (0.85, 0.93) | (0.85, 0.95)         |
| BMI                                           | – | – | – | 1.01         | 1.01                 |
|                                               |   |   |   | (1.00, 1.01) | (1.00, 1.02)         |
| Allodynia, yes (ASC ≥3; reference:<br>ASC <3) | – | – | – | –            | 1.38<br>(1.21, 1.56) |
| Migraine symptom severity (MSSS<br>score)     | – | – | – | –            | 1.04<br>(1.02, 1.06) |

ASC, Allodynia Symptom Checklist; BMI, body mass index; GAD-7, Generalized Anxiety Disorder 7-item scale; MHDs, monthly headache days; MIDAS, Migraine Disability Assessment; MSSS, Migraine Symptom Severity Scale; mTOQ-5, 5-item Migraine Treatment Optimization Questionnaire; PHQ-9, 9-item Patient Health Questionnaire.
