# Supplementary material for: Optimized Acute Treatment of Migraine Is Associated With Greater Productivity in People With Migraine: Results From the Chronic Migraine Epidemiology and Outcomes (CaMEO) Study
Source: PubMed Central journal article supplement — J Occup Environ Med. 2023 Jan 25;65(4):e261–8. doi: 10.1097/JOM.0000000000002801 (PMC10090340; doi:10.1097/jom.0000000000002801), 2023-01-25
Supplement: joem-65-e261-s006.pdf [file joem-65-e261-s006.pdf]

**Table S5.** Fully Adjusted Negative Binomial Regression Models Run Separately for Black/African American Respondents and White Respondents

|                                                | Rate Ratio (95% CI)            |                      |                      |                      |                      |                      |
|------------------------------------------------|--------------------------------|----------------------|----------------------|----------------------|----------------------|----------------------|
|                                                | Black/African American (n=302) |                      |                      | White (n=1378)       |                      |                      |
|                                                | Total LPT                      | Presenteeism         | Absenteeism          | Total LPT            | Presenteeism         | Absenteeism          |
| MHDs (reference: ≤3 MHDs)                      |                                |                      |                      |                      |                      |                      |
| 4-7                                            | 1.78<br>(1.29, 2.46)           | 1.87<br>(1.26, 2.78) | 1.57<br>(1.06, 2.32) | 2.06<br>(1.78, 2.38) | 2.09<br>(1.78, 2.46) | 1.90<br>(1.56, 2.31) |
| 8-14                                           | 2.79<br>(1.96, 3.97)           | 2.83<br>(1.86, 4.29) | 3.05<br>(1.97, 4.71) | 3.23<br>(2.72, 3.83) | 3.63<br>(3.00, 4.39) | 2.35<br>(1.87, 2.96) |
| ≥15                                            | 3.87<br>(2.52, 5.96)           | 3.94<br>(2.37, 6.56) | 3.50<br>(2.06, 5.95) | 4.65<br>(3.86, 5.61) | 5.25<br>(4.26, 6.46) | 3.29<br>(2.58, 4.19) |
| mTOQ-5 score (reference: 5)                    |                                |                      |                      |                      |                      |                      |
| 4                                              | 1.06<br>(0.76, 1.49)           | 1.05<br>(0.69, 1.58) | 1.07<br>(0.71, 1.62) | 1.22<br>(1.03, 1.44) | 1.19<br>(0.99, 1.43) | 1.21<br>(0.96, 1.51) |
| 3                                              | 1.50<br>(1.04, 2.17)           | 1.55<br>(1.00, 2.41) | 1.30<br>(0.83, 2.03) | 1.46<br>(1.23, 1.73) | 1.42<br>(1.17, 1.72) | 1.51<br>(1.20, 1.91) |
| 2                                              | 1.52<br>(0.95, 2.43)           | 1.51<br>(0.86, 2.64) | 1.55<br>(0.86, 2.82) | 1.48<br>(1.21, 1.80) | 1.41<br>(1.13, 1.76) | 1.71<br>(1.32, 2.22) |
| ≤1                                             | 1.69<br>(1.03, 2.75)           | 1.60<br>(0.89, 2.90) | 2.03<br>(1.12, 3.66) | 1.58<br>(1.28, 1.94) | 1.44<br>(1.14, 1.82) | 1.99<br>(1.52, 2.62) |
| Female                                         | 0.97<br>(0.65, 1.43)           | 0.86<br>(0.53, 1.40) | 0.99<br>(0.61, 1.61) | 0.80<br>(0.70, 0.93) | 0.92<br>(0.79, 1.08) | 0.57<br>(0.47, 0.68) |
| Annual household income (reference: <\$30,000) |                                |                      |                      |                      |                      |                      |
| \$30,000-\$49,999                              | 0.95                           | 1.02                 | 0.78                 | 1.05                 | 1.04                 | 1.14                 |

|                                                                   |                      |                      |                      |                      |                      |                      |
|-------------------------------------------------------------------|----------------------|----------------------|----------------------|----------------------|----------------------|----------------------|
|                                                                   | (0.57, 1.57)         | (0.56, 1.86)         | (0.41, 1.50)         | (0.83, 1.33)         | (0.80, 1.35)         | (0.84, 1.57)         |
| \$50,000–\$74,999                                                 | 0.87                 | 0.88                 | 0.89                 | 1.05                 | 1.04                 | 1.20                 |
|                                                                   | (0.53, 1.42)         | (0.49, 1.56)         | (0.48, 1.65)         | (0.83, 1.31)         | (0.80, 1.33)         | (0.89, 1.62)         |
| ≥\$75,000                                                         | 1.05                 | 0.95                 | 1.21                 | 0.96                 | 0.98                 | 0.99                 |
|                                                                   | (0.64, 1.74)         | (0.52, 1.71)         | (0.65, 2.27)         | (0.77, 1.20)         | (0.77, 1.26)         | (0.74, 1.33)         |
| Ethnicity, Hispanic/Latinx<br>(reference: not<br>Hispanic/Latinx) | 0.82<br>(0.53, 1.28) | 0.94<br>(0.55, 1.60) | 0.67<br>(0.39, 1.18) | 1.15<br>(0.98, 1.35) | 1.05<br>(0.88, 1.26) | 1.42<br>(1.15, 1.75) |
| Education (reference: high school or less)                        |                      |                      |                      |                      |                      |                      |
| Some college, technical<br>school, or technical school<br>degree  | 1.34<br>(0.73, 2.47) | 1.39<br>(0.66, 2.92) | 1.49<br>(0.69, 3.20) | 1.03<br>(0.85, 1.25) | 1.10<br>(0.89, 1.36) | 0.87<br>(0.68, 1.13) |
| 4-year college degree                                             | 1.25<br>(0.67, 2.31) | 1.39<br>(0.66, 2.93) | 1.14<br>(0.52, 2.48) | 1.01<br>(0.83, 1.23) | 1.06<br>(0.85, 1.32) | 0.85<br>(0.65, 1.10) |
| Post-college degree                                               | 1.09<br>(0.48, 2.46) | 1.64<br>(0.61, 4.41) | 0.47<br>(0.16, 1.38) | 1.02<br>(0.82, 1.27) | 1.17<br>(0.91, 1.49) | 0.68<br>(0.51, 0.92) |
| Health insurance                                                  | 1.24<br>(0.68, 2.26) | 1.22<br>(0.60, 2.49) | 1.28<br>(0.60, 2.74) | 1.07<br>(0.83, 1.37) | 0.98<br>(0.74, 1.30) | 1.38<br>(0.98, 1.00) |
| Age (10-year intervals)                                           | 0.99<br>(0.86, 1.14) | 1.05<br>(0.88, 1.24) | 0.91<br>(0.76, 1.08) | 0.89<br>(0.84, 0.94) | 0.87<br>(0.82, 0.93) | 0.94<br>(0.87, 1.01) |
| BMI                                                               | 1.01<br>(0.99, 1.03) | 1.01<br>(0.99, 1.04) | 1.00<br>(0.98, 1.03) | 1.00<br>(0.99, 1.01) | 1.00<br>(1.00, 1.01) | 0.99<br>(0.98, 1.00) |
| Allodynia presence (ASC ≥3)                                       | 1.18<br>(0.90, 1.54) | 1.33<br>(0.97, 1.84) | 0.95<br>(0.68, 1.31) | 1.25<br>(1.10, 1.42) | 1.24<br>(1.07, 1.43) | 1.30<br>(1.09, 1.54) |
| MSSS                                                              | 1.04<br>(1.00, 1.08) | 1.05<br>(1.00, 1.10) | 1.02<br>(0.97, 1.07) | 1.04<br>(1.02, 1.07) | 1.04<br>(1.02, 1.07) | 1.05<br>(1.02, 1.08) |

|                               |                      |                      |                      |                      |                      |                      |
|-------------------------------|----------------------|----------------------|----------------------|----------------------|----------------------|----------------------|
| Depression (PHQ-9 $\geq 10$ ) | 1.78<br>(1.25, 2.54) | 1.96<br>(1.26, 3.05) | 1.48<br>(0.97, 2.26) | 1.34<br>(1.15, 1.56) | 1.32<br>(1.11, 1.57) | 1.48<br>(1.20, 1.81) |
| Anxiety (GAD-7 $\geq 10$ )    | 1.02<br>(0.71, 1.45) | 0.98<br>(0.64, 1.52) | 1.03<br>(0.67, 1.58) | 1.18<br>(1.15, 1.56) | 1.22<br>(1.04, 1.45) | 0.96<br>(0.78, 1.17) |

ASC, Allodynia Symptom Checklist; BMI, body mass index; GAD-7, Generalized Anxiety Disorder 7-item scale; LPT, lost productive time; MHDs, monthly headache days; MIDAS, Migraine Disability Assessment; MSSS, Migraine Symptom Severity Scale; mTOQ-5, 5-item Migraine Treatment Optimization Questionnaire; PHQ-9, 9-item Patient Health Questionnaire.
