# Supplementary material for: Optimized Acute Treatment of Migraine Is Associated With Greater Productivity in People With Migraine: Results From the Chronic Migraine Epidemiology and Outcomes (CaMEO) Study
Source: PubMed Central journal article supplement — J Occup Environ Med. 2023 Jan 25;65(4):e261–8. doi: 10.1097/JOM.0000000000002801 (PMC10090340; doi:10.1097/jom.0000000000002801), 2023-01-25
Supplement: joem-65-e261-s007.pdf [file joem-65-e261-s007.pdf]

**Table S6.** Fully Adjusted Negative Binomial Regression Models Run Separately for Hispanic/Latinx Respondents and Not Hispanic/Latinx Respondents

|                                                | Rate Ratio (95% CI)     |                      |                      |                              |                      |                      |
|------------------------------------------------|-------------------------|----------------------|----------------------|------------------------------|----------------------|----------------------|
|                                                | Hispanic/Latinx (n=313) |                      |                      | Not Hispanic/Latinx (n=1471) |                      |                      |
|                                                | Total LPT               | Absenteeism          | Presenteeism         | Total LPT                    | Absenteeism          | Presenteeism         |
| MHDs (reference: ≤3 MHDs)                      |                         |                      |                      |                              |                      |                      |
| 4-7                                            | 1.97<br>(1.41, 2.75)    | 1.75<br>(1.18, 2.58) | 2.05<br>(1.39, 3.03) | 1.98<br>(1.72, 2.28)         | 1.81<br>(1.50, 2.2)  | 2.02<br>(1.72, 2.37) |
| 8-14                                           | 2.94<br>(2.09, 4.13)    | 1.98<br>(1.33, 2.94) | 3.39<br>(2.27, 5.07) | 2.99<br>(2.53, 3.53)         | 2.35<br>(1.87, 2.94) | 3.24<br>(2.69, 3.91) |
| ≥15                                            | 3.70<br>(2.53, 5.42)    | 2.75<br>(1.79, 4.24) | 4.28<br>(2.72, 6.73) | 4.46<br>(3.70, 5.39)         | 3.56<br>(2.77, 4.57) | 4.78<br>(3.86, 5.91) |
| mTOQ-5 score (reference: 5)                    |                         |                      |                      |                              |                      |                      |
| 4                                              | 1.08<br>(0.77, 1.52)    | 0.95<br>(0.63, 1.43) | 1.16<br>(0.78, 1.75) | 1.27<br>(1.09, 1.49)         | 1.18<br>(0.95, 1.47) | 1.30<br>(1.09, 1.56) |
| 3                                              | 1.06<br>(0.74, 1.53)    | 1.14<br>(0.75, 1.74) | 1.00<br>(0.65, 1.55) | 1.58<br>(1.34, 1.87)         | 1.44<br>(1.15, 1.81) | 1.64<br>(1.36, 1.98) |
| 2                                              | 1.34<br>(0.90, 2.01)    | 1.34<br>(0.84, 2.12) | 1.39<br>(0.86, 2.24) | 1.50<br>(1.24, 1.83)         | 1.71<br>(1.32, 2.22) | 1.44<br>(1.15, 1.79) |
| ≤1                                             | 1.55<br>(1.02, 2.35)    | 2.20<br>(1.37, 3.54) | 1.30<br>(0.80, 2.13) | 1.63<br>(1.32, 2.01)         | 1.89<br>(1.43, 2.50) | 1.56<br>(1.23, 1.98) |
| Female                                         | 0.91<br>(0.68, 1.21)    | 0.90<br>(0.65, 1.26) | 0.91<br>(0.65, 1.29) | 0.82<br>(0.71, 0.94)         | 0.62<br>(0.51, 0.76) | 0.90<br>(0.76, 1.06) |
| Annual household income (reference: <\$30,000) |                         |                      |                      |                              |                      |                      |
| \$30,000-\$49,999                              | 0.82                    | 1.08                 | 0.75                 | 1.02                         | 1.08                 | 1.00                 |

|                                                            |              |              |              |              |              |              |
|------------------------------------------------------------|--------------|--------------|--------------|--------------|--------------|--------------|
|                                                            | (0.53, 1.29) | (0.64, 1.82) | (0.44, 1.28) | (0.81, 1.28) | (0.79, 1.47) | (0.77, 1.29) |
| \$50,000–\$74,999                                          | 1.13         | 1.21         | 1.12         | 0.96         | 1.17         | 0.90         |
|                                                            | (0.74, 1.73) | (0.74, 1.98) | (0.68, 1.87) | (0.77, 1.20) | (0.87, 1.57) | (0.70, 1.16) |
| ≥\$75,000                                                  | 1.05         | 1.25         | 0.98         | 0.93         | 1.02         | 0.90         |
|                                                            | (0.69, 1.60) | (0.78, 2.02) | (0.59, 1.61) | (0.75, 1.16) | (0.76, 1.36) | (0.70, 1.16) |
| Race (reference: White only)                               |              |              |              |              |              |              |
| Black/African American only                                | 0.81         | 0.73         | 0.88         | 1.38         | 1.92         | 1.20         |
|                                                            | (0.49, 1.33) | (0.40, 1.33) | (0.49, 1.59) | (1.18, 1.62) | (1.56, 2.38) | (1.00, 1.44) |
| Other                                                      | 0.80         | 0.76         | 0.79         | 0.88         | 1.43         | 0.69         |
|                                                            | (0.55, 1.15) | (0.50, 1.17) | (0.51, 1.23) | (0.64, 1.20) | (0.95, 2.15) | (0.48, 0.99) |
| ≥2 races                                                   | 0.77         | 0.56         | 0.90         | 1.28         | 1.83         | 1.14         |
|                                                            | (0.46, 1.30) | (0.29, 1.11) | (0.49, 1.65) | (0.90, 1.82) | (1.15, 2.91) | (0.76, 1.70) |
| Education (reference: high school or less)                 |              |              |              |              |              |              |
| Some college, technical school, or technical school degree | 1.00         | 1.35         | 0.89         | 1.02         | 0.87         | 1.08         |
|                                                            | (0.66, 1.52) | (0.81, 2.25) | (0.54, 1.45) | (0.84, 1.24) | (0.67, 1.12) | (0.87, 1.35) |
| 4-year college degree                                      | 0.99         | 1.27         | 0.90         | 1.01         | 0.80         | 1.10         |
|                                                            | (0.64, 1.55) | (0.73, 2.20) | (0.53, 1.51) | (0.83, 1.23) | (0.61, 1.05) | (0.88, 1.38) |
| Post-college degree                                        | 0.95         | 0.91         | 0.98         | 1.01         | 0.69         | 1.17         |
|                                                            | (0.53, 1.69) | (0.44, 1.89) | (0.50, 1.92) | (0.81, 1.26) | (0.51, 0.92) | (0.91, 1.50) |
| Health insurance                                           | 0.73         | 0.77         | 0.76         | 1.11         | 1.49         | 1.02         |
|                                                            | (0.46, 1.15) | (0.45, 1.32) | (0.44, 1.30) | (0.86, 1.42) | (1.05, 2.10) | (0.77, 1.35) |
| Age (10-year intervals)                                    | 0.88         | 0.78         | 0.93         | 0.92         | 0.93         | 0.91         |
|                                                            | (0.77, 0.99) | (0.68, 0.90) | (0.79, 1.08) | (0.87, 0.96) | (0.87, 1.00) | (0.86, 0.97) |
| BMI                                                        | 1.00         | 0.99         | 1.00         | 1.00         | 1.00         | 1.00         |

|                             |                      |                      |                      |                      |                      |                      |
|-----------------------------|----------------------|----------------------|----------------------|----------------------|----------------------|----------------------|
|                             | (0.98, 1.01)         | (0.97, 1.01)         | (0.98, 1.02)         | (0.99, 1.01)         | (0.98, 1.01)         | (1.00, 1.01)         |
| Allodynia presence (ASC ≥3) | 1.22<br>(0.94, 1.59) | 1.46<br>(1.06, 2.00) | 1.10<br>(0.80, 1.51) | 1.28<br>(1.13, 1.44) | 1.19<br>(1.01, 1.40) | 1.32<br>(1.15, 1.52) |
| MSSS                        | 1.03<br>(0.99, 1.07) | 1.02<br>(0.97, 1.06) | 1.04<br>(0.99, 1.08) | 1.04<br>(1.02, 1.07) | 1.04<br>(1.01, 1.07) | 1.05<br>(1.02, 1.07) |
| Depression (PHQ-9 ≥10)      | 0.98<br>(0.73, 1.33) | 1.06<br>(0.73, 1.53) | 0.97<br>(0.69, 1.38) | 1.45<br>(1.24, 1.70) | 1.57<br>(1.28, 1.92) | 1.44<br>(1.20, 1.72) |
| Anxiety (GAD-7 ≥10)         | 1.42<br>(1.07, 1.89) | 1.28<br>(0.89, 1.84) | 1.46<br>(1.05, 2.03) | 1.16<br>(1.00, 1.36) | 0.97<br>(0.79, 1.18) | 1.22<br>(1.02, 1.46) |

ASC, Allodynia Symptom Checklist; BMI, body mass index; GAD-7, Generalized Anxiety Disorder 7-item scale; LPT, lost productive time; MHDs, monthly headache days; MIDAS, Migraine Disability Assessment; MSSS, Migraine Symptom Severity Scale; mTOQ-5, 5-item Migraine Treatment Optimization Questionnaire; PHQ-9, 9-item Patient Health Questionnaire.
